# Supplementary material for: Exploring the biomarkers and potential therapeutic drugs for sepsis via integrated bioinformatic analysis
Source: BMC Infect Dis. 2024 Jan 2;24:32. doi: 10.1186/s12879-023-08883-9 (PMC10763157; doi:10.1186/s12879-023-08883-9)
Supplement: Supplementary file 3 — Additional file 3: Table S2. The top significant DEGs among three datasets. [file 12879_2023_8883_MOESM3_ESM.xlsx]

## Sheet: Table 2
Supplementary Table 2. The top significant DEGs among three datasets.
GSE28750								GSE57065								GSE95233
gene	logFC	AveExpr	t	P.Value	adj.P.Val	B		gene	logFC	AveExpr	t	P.Value	adj.P.Val	B		gene	logFC	AveExpr	t	P.Value	adj.P.Val	B
MCEMP1	4.39123	9.3182	20.2761	1.81223e-19	4.14639e-15	33.6982		MCEMP1	4.48773	8.92327	25.3414	8.3469e-32	1.90977e-27	61.7637		MCEMP1	4.144	11.1277	32.6478	2.81694e-46	6.44517e-42	94.684
PLBD1	1.78165	11.187	15.307	5.14934e-16	3.41711e-12	26.3289		S100A9	1.2821	13.0954	20.8366	1.32069e-27	1.51087e-23	52.462		GADD45A	3.22552	8.46292	25.7962	3.48152e-39	3.98286e-35	78.8049
HP	4.75491	7.30624	15.2578	5.62562e-16	3.41711e-12	26.2451		IRAK3	2.87508	6.78003	20.6124	2.22969e-27	1.70051e-23	51.9537		S100A9	1.98389	12.1693	25.3139	1.25108e-38	9.54158e-35	77.5511
S100A12	3.15391	11.8537	15.2245	5.97396e-16	3.41711e-12	26.1881		CNIH4	1.55582	7.1264	19.995	9.65181e-27	5.52084e-23	50.5292		CD177	5.98904	9.37011	24.1821	2.71989e-37	1.55578e-33	74.5277
RETN	4.71879	7.29461	14.6177	1.81809e-15	8.3196e-12	25.1299		UPP1	2.17201	8.38063	19.8931	1.2333e-26	5.64356e-23	50.2906		ESYT1	-2.36679	8.74326	-23.9125	5.75763e-37	2.02591e-33	73.7903
NOV	-1.22084	5.29233	-14.3338	3.09731e-15	1.18111e-11	24.6215		S100A12	3.13255	11.6807	19.7197	1.87609e-26	7.15418e-23	49.8821		SRRM1	-1.15365	8.01724	-23.8892	6.14535e-37	2.02591e-33	73.7262
CR1	1.64685	6.78376	13.848	7.85196e-15	2.56647e-11	23.7312		ESYT1	-2.10006	7.77446	-19.3057	5.16563e-26	1.52731e-22	48.8948		S100A12	3.29306	11.5844	23.8861	6.19816e-37	2.02591e-33	73.7178
CNIH4	1.44741	7.15262	13.7122	1.02268e-14	2.87999e-11	23.4777		HP	5.09127	7.72683	19.2922	5.34026e-26	1.52731e-22	48.8624		HP	4.22137	9.68505	23.3689	2.66446e-36	7.62035e-33	72.2828
CLEC4D	3.74164	6.93561	13.6599	1.13286e-14	2.87999e-11	23.3794		GYG1	2.99961	9.99184	19.2203	6.37926e-26	1.62175e-22	48.6889		QRICH1	-1.24919	8.76859	-23.0971	5.79142e-36	1.41418e-32	71.5183
ID3	-1.49076	5.78551	-13.5828	1.31791e-14	3.01537e-11	23.2341		ANXA3	4.43828	8.92454	18.9225	1.33851e-25	3.0625e-22	47.9655		S100A8	2.10539	12.43	23.0744	6.18085e-36	1.41418e-32	71.4542
ANXA3	3.88845	8.70114	13.526	1.47396e-14	3.06585e-11	23.1265		CD177	6.16454	8.34459	18.5423	3.4913e-25	7.2619e-22	47.0285		SAMSN1	3.20667	6.75478	22.6291	2.24057e-35	4.66039e-32	70.1851
HK3	2.24798	9.26017	13.3793	1.97053e-14	3.75714e-11	22.8473		MAPK14	1.77977	8.21394	18.0059	1.38447e-24	2.55248e-21	45.6802		RGL4	3.0976	9.61127	22.2632	6.54959e-35	1.15273e-31	69.1273
CD177	5.62812	7.35634	13.0382	3.90714e-14	6.87656e-11	22.1878		GPR84	4.73676	6.84188	17.988	1.45027e-24	2.55248e-21	45.6347		UPP1	2.0598	9.31121	22.181	8.34702e-35	1.36414e-31	68.8881
GPR84	3.8733	6.27705	12.8209	6.08168e-14	9.9392e-11	21.7607		ARHGEF18	-1.47574	9.32525	-17.9278	1.69617e-24	2.77202e-21	45.4813		TXN	2.12203	9.8656	21.7352	3.1501e-34	4.80495e-31	67.5773
CYSTM1	2.62791	10.4138	12.6803	8.12113e-14	1.08187e-10	21.4812		METTL9	1.77121	8.10095	17.8368	2.15038e-24	3.28005e-21	45.2488		PCMT1	1.64194	8.85216	21.7036	3.464e-34	4.95352e-31	67.4835
SNX3	1.45275	10.381	12.6523	8.60399e-14	1.08187e-10	21.4253		GATA3	-1.73489	4.70043	-17.7087	3.0082e-24	4.30173e-21	44.9197		IL1R2	3.45307	10.7738	21.5378	5.70792e-34	7.52068e-31	66.9903
RAB13	2.00805	6.23795	12.6493	8.65846e-14	1.08187e-10	21.4192		SAMSN1	3.32954	7.38634	17.6381	3.62176e-24	4.87446e-21	44.7378		SNX3	1.62172	9.17591	21.5259	5.91662e-34	7.52068e-31	66.9548
UPP1	1.94167	8.315	12.6314	8.98409e-14	1.08187e-10	21.3835		TLR5	2.21695	7.93237	17.5724	4.30738e-24	5.47516e-21	44.5677		ARG1	3.52922	7.05019	21.4334	7.82866e-34	9.42736e-31	66.6782
IRAK3	2.76489	6.65798	12.4831	1.22269e-13	1.34573e-10	21.0853		GADD45A	3.2871	7.88877	17.4633	5.74981e-24	6.92398e-21	44.2844		NFATC2	-1.76898	5.86424	-21.3309	1.06866e-33	1.22255e-30	66.3708
TLR5	2.32555	7.95264	12.4072	1.43297e-13	1.49029e-10	20.9316		HK3	2.33775	9.28178	17.337	8.04521e-24	9.20372e-21	43.9548		ANKRD22	4.23939	7.24475	21.1462	1.8781e-33	2.04623e-30	65.8136
LDHB	-2.16116	10.7671	-12.3558	1.59619e-13	1.58786e-10	20.8271		GRB10	2.38267	5.77211	17.1262	1.41437e-23	1.541e-20	43.4009		GPR84	4.3833	7.27923	21.0892	2.23657e-33	2.32604e-30	65.641
ABLIM1	-1.58092	7.22901	-12.3034	1.78222e-13	1.69905e-10	20.7202		MMP8	7.03194	7.10069	17.097	1.53008e-23	1.59128e-20	43.3237		LSM1	1.61079	6.90023	20.9199	3.76431e-33	3.67454e-30	65.1263
STOM	1.92409	6.9269	12.2799	1.87279e-13	1.71398e-10	20.6722		NELL2	-2.8716	6.67382	-17.0691	1.64957e-23	1.64097e-20	43.2498		UBL5	1.56376	8.33548	20.9122	3.85441e-33	3.67454e-30	65.1029
CD7	-1.94624	6.98793	-12.2306	2.07843e-13	1.81186e-10	20.5711		DDAH2	1.79396	6.98533	16.9741	2.13205e-23	2.03255e-20	42.9978		ANXA3	4.07188	9.05754	20.8848	4.19461e-33	3.83891e-30	65.0193
PFKFB3	2.97618	8.21124	12.2172	2.13813e-13	1.81186e-10	20.5437		FCAR	2.38463	6.24979	16.6919	4.59502e-23	4.11014e-20	42.2431		GYG1	2.59812	10.1908	20.8691	4.40423e-33	3.87572e-30	64.9711
NMT2	-1.65991	5.0755	-12.0463	3.07525e-13	2.51292e-10	20.191		SEPT9	-1.42232	6.5197	-16.6859	4.67062e-23	4.11014e-20	42.227		STOM	1.53955	7.99709	20.8026	5.40934e-33	4.50881e-30	64.7678
SPOCK2	-1.23916	7.27298	-11.9984	3.40707e-13	2.68806e-10	20.0915		FCER1A	-1.83552	3.99251	-16.6543	5.09375e-23	4.12515e-20	42.1417		SDF2	1.18871	6.93932	20.7962	5.51777e-33	4.50881e-30	64.7482
YOD1	2.42657	5.66477	11.9525	3.75979e-13	2.86747e-10	19.9958		MAP2K6	2.01716	5.40642	16.6476	5.18812e-23	4.12515e-20	42.1237		IL10RA	-1.48271	8.77117	-20.4003	1.89707e-32	1.49672e-29	63.5267
FAIM3	-2.61402	9.15237	-11.8928	4.27524e-13	3.1554e-10	19.8709		CR1	1.88887	7.18501	16.6448	5.22855e-23	4.12515e-20	42.1161		IKZF3	-2.00117	5.69473	-20.3402	2.29089e-32	1.74719e-29	63.34
METTL7B	3.29657	5.66759	11.8652	4.53729e-13	3.24416e-10	19.8131		NOV	-1.63249	4.50332	-16.6083	5.77822e-23	4.35489e-20	42.0178		TP53I3	2.37272	7.48165	20.1883	3.6999e-32	2.73077e-29	62.8656
SRPK1	1.12772	7.81683	11.6679	6.96228e-13	4.45993e-10	19.3967		CARD6	1.69518	7.81619	16.5913	6.05563e-23	4.35489e-20	41.9716		ARL4C	-1.9942	6.35869	-20.1205	4.586e-32	3.27899e-29	62.6531
EIF3D	-1.19989	9.65482	-11.6618	7.05575e-13	4.45993e-10	19.3837		DACH1	2.74965	4.87906	16.5843	6.17227e-23	4.35489e-20	41.9529		PCSK7	-1.49041	7.26685	-19.9607	7.62062e-32	5.12823e-29	62.1503
CST7	2.06361	11.2101	11.6547	7.16558e-13	4.45993e-10	19.3686		ABLIM1	-1.73391	6.31323	-16.578	6.28109e-23	4.35489e-20	41.9357		NDUFA1	2.19776	9.08386	19.8621	1.04411e-31	6.82547e-29	61.8385
TESPA1	-1.29339	6.94657	-11.6183	7.75916e-13	4.53579e-10	19.2912		SLC26A8	2.34471	5.41521	16.4917	7.96692e-23	5.36127e-20	41.7018		HMGB2	1.21683	7.56496	19.8186	1.19998e-31	7.62651e-29	61.7007
NELL2	-2.47677	7.72181	-11.6119	7.8678e-13	4.53579e-10	19.2776		SERPINB1	2.00219	8.92417	16.471	8.43354e-23	5.51312e-20	41.6458		NLRC4	2.09935	7.51868	19.7659	1.42097e-31	8.78697e-29	61.5333
GYG1	2.8083	9.50964	11.6084	7.9297e-13	4.53579e-10	19.27		TRAC	-2.53236	8.0287	-16.3941	1.04329e-22	6.55896e-20	41.4365		HK3	2.24567	8.32012	19.7425	1.53216e-31	9.22519e-29	61.4587
METTL9	1.6508	7.97208	11.5664	8.69429e-13	4.73839e-10	19.1804		SPOCK2	-1.61163	6.78679	-16.3882	1.06067e-22	6.55896e-20	41.4202		MMP8	5.78827	7.45705	19.702	1.74513e-31	1.02381e-28	61.3298
MS4A6A	1.03519	8.31848	11.5662	8.6981e-13	4.73839e-10	19.18		SGK223	-2.36497	7.03326	-16.3216	1.27572e-22	7.68115e-20	41.2386		ETS1	-1.8262	7.00128	-19.676	1.89706e-31	1.08512e-28	61.2471
SGK223	-2.2027	7.91668	-11.5324	9.36765e-13	4.96644e-10	19.1077		PGS1	1.73919	8.40567	16.147	2.07589e-22	1.21785e-19	40.7593		FCER1G	1.21862	12.1161	19.6502	2.06126e-31	1.13946e-28	61.1649
TCF7	-1.53158	8.17822	-11.5236	9.55085e-13	4.96644e-10	19.0889		PAQR8	-1.36885	6.8895	-16.1336	2.15527e-22	1.23282e-19	40.7223		RORA	-1.92355	5.6433	-19.6457	2.09167e-31	1.13946e-28	61.1504
