# Supplementary material for: Exploring the biomarkers and potential therapeutic drugs for sepsis via integrated bioinformatic analysis
Source: BMC Infect Dis. 2024 Jan 2;24:32. doi: 10.1186/s12879-023-08883-9 (PMC10763157; doi:10.1186/s12879-023-08883-9)
Supplement: Supplementary file 4 — Additional file 4: Table S3. The detailed five hub genes. [file 12879_2023_8883_MOESM4_ESM.xlsx]

## Sheet: Table 3
Supplementary Table 3. The detailed of five hub genes.
Gene symbol	Official full name	Function
CD3E	CD3 epsilon subunit of T-cell receptor complex	The protein encoded by this gene is the CD3-epsilon polypeptide, which together with CD3-gamma, -delta and -zeta, and the T-cell receptor alpha/beta and gamma/delta heterodimers, forms the T-cell receptor-CD3 complex. This complex plays an important role in coupling antigen recognition to several intracellular signal-transduction pathways. The epsilon polypeptide plays an essential role in T-cell…
HLA-DRA	major histocompatibility complex, class II, DR alpha	HLA-DRA is one of the HLA class II alpha chain paralogues. This molecule is expressed on the surface of various antigen presenting cells such as B lymphocytes, dendritic cells, and monocytes/macrophages, and plays a central role in the immune system and response by presenting peptides derived from extracellular proteins, in particular, pathogen-derived peptides to T cells.
IL2RB	interleukin 2 receptor subunit beta	The interleukin 2 receptor, which is involved in T cell-mediated immune responses, is present in 3 forms with respect to ability to bind interleukin 2.
ITK	IL2 inducible T cell kinase	This gene encodes an intracellular tyrosine kinase expressed in T-cells. It is thought to play a role in T-cell proliferation and differentiation.
LAT	linker for activation of T cells	The protein encoded by this gene is phosphorylated by ZAP-70/Syk protein tyrosine kinases following activation of the T-cell antigen receptor (TCR) signal transduction pathway.
Note: the function extracted from GeneCards database.
